# Supplementary material for: Mouse retinal cell behaviour in space and time using light sheet fluorescence microscopy
Source: eLife. 2020 Feb 19;9:e49779. doi: 10.7554/eLife.49779 (PMC7162655; doi:10.7554/eLife.49779)
Supplement: Figure 2—figure supplement 1—source data 1. [file elife-49779-fig2-figsupp1-data1.xlsx]

## Sheet: Supp. Figure 2
Supp. 2c)
4wk wild type					4wk rho ko					8wk rho ko
Slice	Area	Nuclei	Normalised		Slice	Area	Nuclei	Normalised		Slice	Area	Nuclei	Normalised
207	19140.1	881	0.046029		211	21048.5	730	0.0346819		174	11007.4	333	0.0302523
257	18033.4	744	0.0412569		161	19417.4	650	0.0334751		224	11186	327	0.0292329
307	10908.7	451	0.0413433		111	20026.6	573	0.0286119		274	11958.9	338	0.0282636
167	16173.4	693	0.042848		61	18833.9	476	0.0252736		324	11025.3	322	0.0292056
107	15172.4	601	0.0396113		11	16500.1	405	0.0245452		124	11033.1	280	0.0253783
57	13531	536	0.0396128		262	21292.7	770	0.0361627		74	11173.4	260	0.0232696
					311	22383.1	851	0.0380198		24	11432.6	229	0.0200305
					361	23027.5	898	0.0389969
					411	23819.8	967	0.0405966
Supp. 2d)
4 WK WT						4 WK RHO KO						8 WK RHO KO
	Position						Position						Position
Slice	Bottom	Middle	Top	Average		Slice	Bottom	Middle	Top	Average		Slice	Bottom	Middle	Top	Average
211	49.1961	40.8108	40.5818	43.5295		211	47.7112	37.6258	46.5495	43.9622		174	22.7392	20.2869	19.1375	20.7212
261	40.7826	41.3446	45.4897	42.539		261	41.3826	44.2064	48.6646	44.7512		224	23.6967	21.7731	16.2315	20.5671
311	39.4446	39.4446	40.7602	39.8831		311	45.6209	44.4283	47.8166	45.9553		274	31.1978	28.1175	17.6197	25.645
161	48.5242	43.5173	46.5653	46.2023		361	40.3457	45.4551	52.1598	45.9869		324	27.4495	19.7153	20.4259	22.5302
111	48.3401	46.653	48.4637	47.8189		411	46.7183	40.7723	52.5644	46.685		124	20.1987	21.1326	20.1364	20.4892
61	52.4605	49.8778	42.6826	48.3403		161	47.7399	40.9647	41.7208	43.4751		74	20.2816	19.9532	24.4977	21.5775
11	54.6863	54.009	46.7183	51.8045		111	47.6077	41.2608	42.9886	43.9524		24	20.4515	18.5476	23.816	20.9384
						61	48.0028	47.6673	42.1584	45.9428
						11	43.8773	46.7183	45.3397	45.3118
