# Supplementary material for: Mouse retinal cell behaviour in space and time using light sheet fluorescence microscopy
Source: eLife. 2020 Feb 19;9:e49779. doi: 10.7554/eLife.49779 (PMC7162655; doi:10.7554/eLife.49779)
Supplement: Figure 3—source data 1. [file elife-49779-fig3-data1.xlsx]

## Sheet: Figure 3
3d)					3e)
NearOptic Measurements					Vascular Front Measurements
Confocal - Width	LSFM - Width	Confocal - Depth	LSFM - Depth		Confocal - Width	LSFM - Width	Confocal - Depth	LSFM - Depth
17	19.5	4.97	39.1		13.3	11.5	3.5	26
16.9	29.3	6.8	55.7		11.8	9.37	4.7	25.5
17.1	21.6	6.38	55		12.5	9.89	6.63	22.5
13.8	14.8	5.31	29.3		13	9.36	8.08	23.4
21	20.1	4.2	34.6		11.4	7.84	8.75	24
19	19	4.87	36.4		12.7	12.3	6.57	22.3
14	13.3	5.34	41.5		13	6.18	4.97	17.3
24.4	17.2	5.68	38.9		20.6	7.25	6.49	19.4
13.8	11.3	5.25	19.7		12.2	8.08	4.81	22
14.4	17.3	3.9	19.3		7.81	8.84	4.6	20.3
19.6	13.9	5.58	46.2		18.7	11.9	3.11	34.5
16	12	5.52	26.9		17.6	12.4	4.55	26.7
17.2	17.6	4.56	22.9		17.6	12.3	5.86	38.3
18.2	18.2	4.08	39		12.9	7.71	3.56	29.7
10.1	11.1	6.02	23.7		12.6	11.2	4.81	35.3
14	16.4	6.55	28.4		13.7	13.7	5.31	36.5
11.9	12.8	5.75	19.9		10.4	7.73	5	24.7
21.4	23.7	5.23	21.9		13.4	10.6	4.5	25.5
21.1	15.3	5.16	28.2		9.26	10.4	5	27.2
19.1	20.8	4.81	27.4		9.53	6.99	5	21.5
14.1	16.8	5	16.7		18	11.2	5	17.3
26.6	12.9	12.2	35.8		12.2	8.34	6.02	27.7
19.1	16.3	8.9	47.3		8.94	7.22	6.06	21.8
22.4	20.6	5.08	30		14.1	7.61	4.58	21.1
29	18.2	9.07	47.2		11.9	11.4	5.51	11
17.2	10.7	10.3	32		8.39	8.54	4.35	14.4
24.8	10.5	9.2	34.1		10.3	13.2	8.49	20.2
30.5	16.6	14.9	21.3		11.9	13.4	2.69	20.2
28.1	15.1	9.95	31.3
14.5	9.25	10.6	19.6
17.5	12.4	7.56	23.3
15.2	9.03	8.14	15.2
15	12.7	7.05	21.9
15.9	11.9	7.48	36.8
20.3	17.5	7.66	42.3
19.2	13.4	10.2	32.4
30.7	18.4	13.3	33
20.2	15.5	10.3	26.6
30.5	21.2	12.3	42.6
