# Supplementary material for: Mouse retinal cell behaviour in space and time using light sheet fluorescence microscopy
Source: eLife. 2020 Feb 19;9:e49779. doi: 10.7554/eLife.49779 (PMC7162655; doi:10.7554/eLife.49779)
Supplement: Figure 4—source data 1. [file elife-49779-fig4-data1.xlsx]

## Sheet: Figure 4
4c)
Distance (um)	Time (min)
5.24786	1
2.45186	9
1.44542	4
2.81937	8
2.52534	7
1.46723	4
1.5	3
2.59362	6
2.62338	10
2.52865	20
2.01059	5
2.08159	9
2.54603	6
2.76809	7
2.14912	28
3.35263	9
3.96745	7
2.50796	6
2.36718	8
1.6657	2
2.45058	7
2.09615	5
2.76134	4
3.49739	3
2.80606	5
1.97768	5
2.99981	8
1.93752	8
3.57153	16
2.45517	9
2.16315	8
3.88287	4
2.61264	6
3.22601	15
2.95904	12
2.8616	4
2.47249	15
4.41501	4
2.43859	22
2.80552	15
3.20933	10
2.18303	14
3.10753	4
1.51539	17
2.09456	8
3.7524	8
3.42397	7
1.65132	2
1.70366	11
5.36945	9
2.3179	6
1.70758	10
1.90027	6
6.88065	2
2.05469	6
2.1378	7
1.32812	10
