# Supplementary material for: Mouse retinal cell behaviour in space and time using light sheet fluorescence microscopy
Source: eLife. 2020 Feb 19;9:e49779. doi: 10.7554/eLife.49779 (PMC7162655; doi:10.7554/eLife.49779)
Supplement: Figure 5—source data 1. [file elife-49779-fig5-data1.xlsx]

## Sheet: Figure 5
5b)				5c)				5d)				5e)
Number of nuclei	Size (um3)			# of nuclei	Number of connections to plexus			Total Number of nuclei	Number of curved nuclei			Small Tufts				Knotting Tufts				Big Tufts				All Tufts
4	17787			3	3			4	1			Confocal Tufts	LSFM Tufts			Confocal Tufts	LSFM Tufts			Confocal Tufts	LSFM Tufts			Confocal Tufts	LSFM Tufts
2	3437.8			2	2			2	0			18.9687	28.2351			36.4242	52.9141			34.5338	78.9585			18.9687	28.2351
3	8589.4			4	3			3	0			29.9594	22.9807			35.7231	27.6893			34.2798	59.7822			29.9594	22.9807
7	31355			7	4			5	1			47.0467	47.0467			32.4905	43.6476			34.2069	36.976			47.0467	47.0467
11	50760			11	3			7	3			25.2861	45.9839			34.7772	37.5461			33.0783	43.7351			25.2861	45.9839
5	25963			7	5			11	4			25.6793	42.5838			31.6653	33.7415			36.2217	73.9877			25.6793	52.9141
7	16700			15	4			15	4			14.4204	21.0187			34.8142	28.3007			37.3598	85.6406			14.4204	27.6893
15	31349			20	3			20	3			25.6961	19.5546			36.4928	36.5438			30.0748	54.8181			25.6961	43.6476
20	33940			6	3			16	3			24.3507	28.8814			21.1956	38.628			34.254	65.756			24.3507	37.5461
16	31764			8	3			11	2			21.9481	28.0743			20.6202	61.0682			35.9842				21.9481	78.9585
11	52152			10	4			7	1			23.9801	20.1511			34.582	36.7043			33.2061				23.9801	59.7822
48	169556			48	7			6	2			21.5846	24.1967			31.1062				35.37				21.5846	42.5838
54	141687			54	9			8	2			25.1362	23.4146			26.6613				33.4187				36.4242	21.0187
6	15611.1			25	9			10	4			28.4139	51.3818			28.8743				26.5143				35.7231	33.7415
8	48687			35	12			25	4			24.0489	25.7956			31.2755				30.081				32.4905	19.5546
10	39716.5							35	3			27.5143	22.3159			30.5291				28.9918				34.7772	28.8814
25	122977							48	3			24.2138	19.0935			19.6348				27.8483				31.6653	28.0743
35	170409							54	3			23.8045	51.7487			21.4845				32.5254				34.8142	20.1511
												21.6427				19.8847				32.203				36.4928	24.1967
												28.1329				19.959				33.5043				21.1956	23.4146
												21.71				17.8179				33.2943				20.6202	51.3818
												22.1514				28.4054				34.7821				34.582	25.7956
												20.3243				26.508				29.7484				31.1062	22.3159
												16.5094				31.7374				30.6708				34.5338	19.0935
												21.1892				24.1728				20.4789				34.2798	51.7487
												17.4401				26.4935				33.1055				34.2069	28.3007
												14.0922				26.3938				29.9757				33.0783	36.5438
																19.173				27.5786				36.2217	38.628
																24.4402				11.9449				37.3598	61.0682
																18.323				19.6711				30.0748	36.7043
																22.8603								34.254	36.976
																								35.9842	43.7351
																								33.2061	73.9877
																								35.37	85.6406
																								33.4187	54.8181
																								26.5143	65.756
																								25.1362
																								28.4139
																								24.0489
																								27.5143
																								24.2138
																								23.8045
																								21.6427
																								28.1329
																								21.71
																								22.1514
																								26.6613
																								28.8743
																								31.2755
																								30.5291
																								19.6348
																								21.4845
																								19.8847
																								19.959
																								17.8179
																								28.4054
																								26.508
																								31.7374
																								24.1728
																								26.4935
																								30.081
																								28.9918
																								27.8483
																								32.5254
																								32.203
																								33.5043
																								33.2943
																								34.7821
																								29.7484
																								30.6708
																								20.3243
																								16.5094
																								21.1892
																								17.4401
																								14.0922
																								26.3938
																								19.173
																								24.4402
																								18.323
																								22.8603
																								20.4789
																								33.1055
																								29.9757
																								27.5786
																								11.9449
																								19.6711
