# Supplementary material for: Mouse retinal cell behaviour in space and time using light sheet fluorescence microscopy
Source: eLife. 2020 Feb 19;9:e49779. doi: 10.7554/eLife.49779 (PMC7162655; doi:10.7554/eLife.49779)
Supplement: Figure 6—figure supplement 3—source data 1. [file elife-49779-fig6-figsupp3-data1.xlsx]

## Sheet: Supp. Figure 5
Supp. 5h)
Control vs. Drugged Volumes
Everolimus	Control
7195	9748
4735	7895
2378	10000
6766	6951
3914	8968
3493
6163
1113
4910
Supp 5i)
Nuclei vs. Volume Counts (Everolimus)
Nuclei	Volumes
9	7195
10	4735
5	2378
9	6766
8	3914
7	31355
11	50760
4	17787
5	25963
7	16700
11	52152
2	3437.8
6	15611.1
8	48687
10	39716.5
3	8589.4
