# Supplementary material for: Mouse retinal cell behaviour in space and time using light sheet fluorescence microscopy
Source: eLife. 2020 Feb 19;9:e49779. doi: 10.7554/eLife.49779 (PMC7162655; doi:10.7554/eLife.49779)
Supplement: Figure 7—source data 1. [file elife-49779-fig7-data1.xlsx]

## Sheet: Figure 7
7d)				7e)				7f)
P5 Max. Length (um)	OIR Max. Length (um)			P5 Total Time (min)	OIR Total Time (min)			P5 Extension Speed (um/min)	OIR extension Speed (um/min)	P5 Retraction Speed (um)	OIR Retraction Speed (um)	P5 Total (E+R) Speed (um)	OIR Total (E+R) Speed (um)		WT Expansion Time	OIR Expansion Time		WT Retraction Time	OIR Retraction Time
22.546	6.724			19.5	6			2.31241	2.24133	2.31241	2.24133	1.15621	1.12067		9.75	3		9.75	3
16.038	6.207			14.25	7			3.05486	1.2414	1.782	3.1035	1.12547	0.886714		5.25	5		9	2
14.842	5.901			20.25	5			1.31929	1.967	1.64911	2.9505	0.732938	1.1802		11.25	3		9	2
24.929	2.903			13.5	4			3.0217	0.967667	4.74838	2.903	1.84659	0.72575		8.25	3		5.25	1
14.219	2.556			3.75	4			18.9587	1.278	4.73967	1.278	3.79173	0.639		0.75	2		3	2
9.532	6.157			2.25	4			0	3.0785	4.23644	3.0785	4.23644	1.53925		0	2		2.25	2
16.038	4.492			17.25	5			1.782	1.49733	1.944	2.246	0.929739	0.8984		9	3		8.25	2
26.383	5.126			32.25	4			1.06598	2.563	3.51773	2.563	0.818078	1.2815		24.75	2		7.5	2
8.06	6.765			5.25	8			2.68667	1.353	3.58222	2.255	1.53524	0.845625		3	5		2.25	3
20.21	5.979			21.75	38			1.49704	0.229962	2.4497	0.49825	0.929195	0.157342		13.5	26		8.25	12
17.537	6.903			10.5	5			2.92283	2.301	3.89711	3.4515	1.67019	1.3806		6	3		4.5	2
10.555	3.478			4.5	3			3.51833	1.739	7.03667	3.478	2.34556	1.15933		3	2		1.5	1
20.354	3.077			21.75	2			1.29232	3.077	3.39233	3.077	0.935816	1.5385		15.75	1		6	1
17.28	5.845			10.5	13			2.56	0.730625	4.608	1.169	1.64571	0.449615		6.75	8		3.75	5
6.527	3.348			2.25	8			0	0.6696	2.90089	1.116	2.90089	0.4185		0	5		2.25	3
19.857	2.367			21.75	8			1.20345	0.4734	3.78229	0.789	0.912966	0.295875		16.5	5		5.25	3
17.346	1.976			7.5	5			3.304	0.494	7.70933	1.976	2.3128	0.3952		5.25	4		2.25	1
17.929	1.812			22.5	5			1.19527	0.604	2.39053	0.906	0.796844	0.3624		15	3		7.5	2
16.12	2.563			26.25	4			1.43289	1.2815	1.07467	1.2815	0.614095	0.64075		11.25	2		15	2
23.04	4.207			24	8			1.70667	1.05175	2.19429	1.05175	0.96	0.525875		13.5	4		10.5	4
10.24	4.329			17.25	9			1.24121	0.7215	1.13778	1.443	0.593623	0.481		8.25	6		9	3
12.337	3.862			10.5	4			1.8277	1.931	3.28987	1.931	1.17495	0.9655		6.75	2		3.75	2
24.704	6.906			36.75	3			0.968784	6.906	2.19591	3.453	0.672218	2.302		25.5	1		11.25	2
18.89				11.25				4.19778		2.79852		1.67911			4.5			6.75
9.415				6.75				2.51067		3.13833		1.39481			3.75			3
22.135				33				0.894343		2.68303		0.670758			24.75			8.25
22.913				15.75				2.18219		4.36438		1.45479			10.5			5.25
12.959				9				2.46838		3.45573		1.43989			5.25			3.75
23.015				15.75				2.36051		3.83583		1.46127			9.75			6
17.109				16.5				1.62943		2.8515		1.03691			10.5			6
11.984				11.25				1.77541		2.66311		1.06524			6.75			4.5
11.874				6				3.1664		5.27733		1.979			3.75			2.25
8.3				5.25				2.76667		3.68889		1.58095			3			2.25
10.067				4.5				3.35567		6.71133		2.23711			3			1.5
10.371				16.5				1.06369		1.53644		0.628545			9.75			6.75
9.769				6.75				2.17089		4.34178		1.44726			4.5			2.25
8.186				12.75				1.09147		1.55924		0.642039			7.5			5.25
14.051				3.75				9.36733		6.24489		3.74693			1.5			2.25
14.734				9				2.80648		3.92907		1.63711			5.25			3.75
							Average	2.6328	1.66946	3.47822	2.09738	1.50613	0.877809
